# Supplementary material
Source: ML conference proceedings conference paper supplement (https://openaccess.thecvf.com/content/CVPR2023/html/Oh_Recovering_3D_Hand_CVPR_2023_paper.html)
Supplement: Supplementary file 1 [file Oh_Recovering_3D_Hand_CVPR_2023_supplemental.zip]

Archive with 2 entries (2 files):
- BlurHandNet.mp4
- BlurHandNet_CVPR2023_ID4973_SUPP.pdf
